# Supplementary material
Source: PubMed Central journal article supplement (PMC2927962)
Supplement: NIHMS225976-supplement-supplement_1.pdf [file NIHMS225976-supplement-supplement_1.pdf]

## **Supplemental Methods**

### ***In situ* hybridization**

Staged E14.5 and E16.5 C57Bl/6J embryos were dissected in DEPC-treated 1X PBS. Isolated gastrointestinal tracts were fixed overnight at 4°C in 4% paraformaldehyde (PFA), embedded in paraffin, and cut into 5 µm sections. In situ hybridization was performed as described previously (Li et al., 2007). Specific probes used for in situ hybridization included: Gata3 (NM\_008091.3; 1028-1591 bp), nephrocan (NM\_025684.2; 758-1450 bp), Sfrp5 (NM\_018780.2; 203-985 bp), Creb3l3 (NM\_145365.3; 683-1361 bp), Tcfec (NM\_031198.2; 258-789), Grem1 (NM\_011824.4; 487-1281), and Axin2 (NM\_015732.4; 2227-3358).

### **Antibodies and immunostaining**

Staged E14.5 and E16.5 C57Bl/6J embryos were dissected in 1X PBS. Excised gastrointestinal tracts were fixed for overnight at 4°C in 4% PFA, embedded in paraffin, and cut into 5 µm sections. Vectastain ABC (Vector) was used for Hnf4γ immunohistochemistry, per the manufacturer's instructions. Sox2 immunofluorescence was performed as described previously (Que et al., 2007). Briefly, sections were deparaffinized in xylene, rehydrated through increasing alcohol concentrations, and boiled for 10 minutes either in Antigen Unmasking Solution (Vector Laboratories, CA) (Sox2) or 10 mM sodium citrate, pH 6.0 (Hnf4γ). Slides were allowed to slowly cool down and then washed with 1X PBS. The sections were blocked with 10% donkey serum/0.01% Triton X-100 in 1X PBS for 1 hour at room temperature. Antibodies used were: rabbit polyclonal anti-Sox2 antibody (1:500, Chemicon, MA); goat polyclonal anti-Hnf4γ (1:500, Santa Cruz Biotechnology, CA); biotinylated horse anti-goat IgG (1:200, Vector); and,

**Supplemental Table 6. Summary of primer sequences and optimized conditions**

| Gene Symbol | Forward primer           | Reverse primer             | Amplicon length (bp) | Temp (deg C) | Cycles | MgCl <sub>2</sub> (mM) | DMSO <sup>1</sup> |
|-------------|--------------------------|----------------------------|----------------------|--------------|--------|------------------------|-------------------|
| Barx1       | GGAGTCGCACCGTATTCACTGAGC | CCGCCACCTTGCAGCACTATTTTC   | 187                  | 58           | 30     | 2.5                    | NO                |
| Cdx1        | CGGACGCCCTACGAATGGATG    | CTGCTGCTGCTGCTGTTCTTC      | 276                  | 61           | 30     | 1.5                    | YES               |
| Cdx2        | GAAACCTGTGCGAGTGGATGC    | TTGTTGCTGCTGCTGCTGTTG      | 284                  | 58           | 30     | 1.5                    | YES               |
| Creb3l3     | CAGTGGCATCTCTGAGGATCTACC | CAGTGAGGTTGAAGCGGGAGG      | 266                  | 61           | 30     | 1.5                    | YES               |
| Foxa1       | GGCATGAGAGCAACGACTGG     | TAGGTGTTTCATGGAGTTCATAGAGC | 115                  | 57           | 30     | 2.5                    | NO                |
| Gli1        | CGCCAAGCACCCAGAATCGG     | CCGAGACACAAGGTCCTTCATCC    | 419                  | 61           | 40     | 6 <sup>2</sup>         | YES               |
| Hnf4a       | GATGCTTCTCGGAGGGTCTGC    | TTGGTGGTATGGCTGTGGAG       | 200                  | 60           | 30     | 1.5                    | NO                |
| Hnf4g       | CGCAGCATTCGGAAGAGTCATG   | CCGCTTGTCAGAGTGTTCATG      | 220                  | 60           | 30     | 1.5                    | NO                |
| Hprt        | AGTCCCAGCGTCGTGATTAGC    | ATAGCCCCCTTGAGCACACAG      | 204                  | 61           | 30     | 2 <sup>2</sup>         | YES <sup>3</sup>  |
| Isx         | ACTTACCCATTACCCTGACATCC  | TCTTCTCCTGCTTCTCCACTTG     | 123                  | 55           | 30     | 1.5                    | YES               |
| Maf         | CAACGGCTTCGAGAAAACG      | CCCACGGAGCATTTAACAAGG      | 111                  | 56           | 30     | 2.5                    | YES               |
| Mafb        | GCAACAGTACCCACTAGCC      | AGCTGGTCATCAGAGAAGCG       | 108                  | 60           | 30     | 2.5                    | YES               |
| Sfrp5       | CCCTGGACAACGACCTCTGC     | CACAAAGTCACTGGAGCACATCTG   | 143                  | 59           | 30     | 2.5                    | YES               |
| Sox2        | CTCGCAGACCTACATGAACG     | AGTGGGAGGAAGAGGTAACC       | 146                  | 59           | 28     | 3                      | NO                |
| Tcfec       | ATGAACCCATGAGCCAGACAG    | AGCATCCGTGAGACCAGCATTAG    | 173                  | 56           | 30     | 2                      | YES               |

<sup>1</sup>To be used at a 2% final concentration.

<sup>2</sup>iQ Supermix contains 6 mM MgCl<sub>2</sub> (qPCR only).

<sup>3</sup>To be used at a 4% final concentration (qPCR only).

Alexa Fluor 488 donkey anti-rabbit IgG (1:1000, Invitrogen, OR). Primary antibodies were diluted in blocking solution and incubated on slides overnight at 4°C. Slides were washed in 1X PBS prior to incubation with appropriate secondary antibodies and DAPI (1:100, Fisher Scientific, PA) (Sox2) for 30 to 60 minutes at room temperature. After 1X PBS wash, coverslips were mounted with ProLong Gold Antifade Reagent (Invitrogen) (Sox2), or sections were lightly counterstained with hematoxylin, dehydrated with serial alcohol/xylene washes and coverslips were mounted with Permount (Fisher). Imaging was done on a Nikon E800 microscope digital imaging system (Nikon, Japan).

### **X-gal staining**

Staged E14.5 or E16.5 embryos from genetic crosses of villin<sup>lacZ/+</sup> or Gli1<sup>lacZ/+</sup> males with C57Bl/6J females were dissected on ice in 1X PBS (Park et al., 2000; Braunstein et al., 2002). The gastrointestinal tract was excised, fixed with 4% PFA for 10 minutes at 4°C, and washed three times in 1X PBS. Tissues were saturated overnight with 30% sucrose (in 1X PBS), embedded and frozen in Optimal Cutting Temperature (OCT) compound (Sakura, Japan), and cut into 5 µm sections. X-gal staining solution was prepared fresh, as follows: 1X PBS (pH 7.5), 2 mM magnesium chloride, 5 mM potassium ferrocyanide, 5 mM potassium ferricyanide, and 1 mg X-gal (from 20 mg/ml stock in DMF). Sectioned tissue was incubated in staining solution at 37°C and monitored periodically to control staining intensity. Sections were then washed three times in 1X PBS, counterstained lightly with eosin and dehydrated with serial alcohol/xylene washes, and coverslips were mounted with Permount. Slides were imaged on an E800 microscope imaging system.

## **qPCR**

Staged E14.5 and E16.5 C57Bl/6J embryos were dissected in 1X PBS. Samples from the duodenum and antrum of individual embryos were collected and RNA was harvested by brief vortexing in MELT (Multi-Enzymatic Liquefaction of Tissue) digestion buffer (Applied Biosystems/Ambion, TX) and purified using the RNeasy kit. A total of eight E14.5 and nine E16.5 samples were obtained (for each tissue). cDNA was prepared with the iScript cDNA Synthesis Kit (Bio-Rad). qPCR reactions were set up using 2X iQ Supermix buffer and iQ iCycler 96-well plates and carried out in an iCycler real-time PCR detection system (Bio-Rad). Data were processed using the iCycler program (Bio-Rad) and imported into Excel (Microsoft, WA) for normalization and statistical analysis. Gli1 Ct values were normalized to Hprt ( $\Delta$ Ct) and then compared to the average  $\Delta$ Ct for E14.5 intestine ( $\Delta\Delta$ Ct). Average  $\Delta\Delta$ Ct values were calculated to determine relative fold difference to E14.5 tissue [ $2^{(-\Delta\Delta$ Ct)}]. 95% confidence intervals were determined using Excel (CONFIDENCE function). PCR conditions were optimized previously in the lab (i.e.- temperature, DMSO, etc; see Supplemental Table 6).

## **RT-PCR**

Staged E14.5 and E16.5 C57Bl/6J embryos were dissected in 1X PBS. Samples from four independent collections were separated by tissue type and time point (e.g. - E14.5 border, E16.5 duodenum, etc.) and then pooled randomly into two groups for replicate analysis. Additionally, fragments of contiguous tissue spanning the antrum, border and proximal duodenum were collected from E14.5 and E16.5 embryos as an input control. Tissue from each group was homogenized in 1 mL of TRIzol (Invitrogen) by drawing it through a 30-gauge needle. Total RNA was prepared according to the manufacturer's instructions, purified by consecutive phenol-

chloroform (2X) and chloroform (2X) extractions, and quantitated by UV spectrophotometry using a NanoDrop (Thermo). For each RNA sample, two independent cDNA preparations were performed using the iScript cDNA Synthesis Kit and pooled for subsequent analysis. Negative “No RT” controls for genomic contamination were prepared from whole E14.5 and E16.5 RNA in a similar manner. PCR was performed on cDNA samples using qRT-PCR-quality primers created by Beacon Designer (PREMIER Biosoft). Individual primer conditions were optimized (i.e.- temperature, number of cycles, magnesium chloride, DMSO, etc; see Supplemental Table 6) prior to PCR. Products from PCR reactions were resolved under UV light with ethidium bromide-loaded, 2% TBE-agarose gels. The band intensity of experimental genes was compared to the housekeeping gene Hprt.

## **Supplemental Figure Legends**

### **Supplemental Figure 1. Diagram of microdissection for microarray experiment**

A photomicrograph showing E14.5 foregut. The pylorus was identified grossly by its muscular constriction (arrows). Small, contiguous pieces of tissue were dissected from the pylorus and surrounding stomach and duodenum. St = stomach, Py = pylorus and D = duodenum.

### **Supplemental Figure 2. Independent validation of microarray data by RT-PCR**

Semi-quantitative RT-PCR was carried out as described in Supplemental Methods. Hprt is used as a control; it does not vary with time and tissue. Tissue specific regulation of Cdx1, Cdx2, Isx, Barx1, Sox2 and Sfrp5 is set by E14.5 and does not vary with time. Mafb and Hnf4 $\gamma$  are preferentially, but not specifically, expressed in the intestine. Tcfec and Creb3l3 are greatly induced in E16.5 duodenum.

| Supplemental Table 3. DAVID analysis of D16 enriched epithelial genes |                        |       |         |                 |     |
|-----------------------------------------------------------------------|------------------------|-------|---------|-----------------|-----|
| Annotation Cluster 1                                                  | Enrichment Score: 5.05 | Count | P-value | Fold Enrichment | FDR |
|                                                                       |                        | 29    | 2.0E-7  | 3.1             | 0   |
| <i>cellular lipid metabolic process</i>                               |                        |       |         |                 |     |
| Annotation Cluster 2                                                  | Enrichment Score: 4.64 | Count | P-value | Fold Enrichment | FDR |
|                                                                       |                        | 40    | 2.4E-15 | 4.7             | 0   |
| <i>transporter</i>                                                    |                        |       |         |                 |     |
| Annotation Cluster 3                                                  | Enrichment Score: 4.1  | Count | P-value | Fold Enrichment | FDR |
|                                                                       |                        | 13    | 1.2E-6  | 6.2             | 0   |
| <i>hydrolase activity, acting on glycosyl bonds</i>                   |                        |       |         |                 |     |
| Annotation Cluster 4                                                  | Enrichment Score: 3.95 | Count | P-value | Fold Enrichment | FDR |
|                                                                       |                        | 30    | 2.2E-10 | 4.2             | 0   |
| <i>carbohydrate metabolism</i>                                        |                        |       |         |                 |     |
| Annotation Cluster 5                                                  | Enrichment Score: 3.44 | Count | P-value | Fold Enrichment | FDR |
|                                                                       |                        | 12    | 1.7E-4  | 4.1             | 0.3 |
| <i>acyltransferase activity</i>                                       |                        |       |         |                 |     |
| Annotation Cluster 6                                                  | Enrichment Score: 3.18 | Count | P-value | Fold Enrichment | FDR |
|                                                                       |                        | 22    | 9.3E-5  | 2.6             | 0.2 |
| <i>organic acid metabolic process</i>                                 |                        |       |         |                 |     |

Note: Only the top annotation term is displayed for a given Annotation Cluster.

**Supplemental Table 4. Summary of gene expression changes in Wnt signaling pathway components**

| Probeset ID  | Symbol        | Description                                             | D14-S14     | D16-S16     | S16-S14    | D16-D14    |
|--------------|---------------|---------------------------------------------------------|-------------|-------------|------------|------------|
| 1437351_at   | Cxxc4         | CXXC finger 4                                           | NC (1.15)   | S16 (2.25)  | NC (1.93)  | D14 (5.01) |
| 1438884_at   | D830007B15Rik | RIKEN cDNA D830007B15 gene                              | D14 (3.62)  | NC (1.40)   | NC (1.36)  | D14 (3.70) |
| 1420512_at   | Dkk2          | dickkopf homolog 2 ( <i>Xenopus laevis</i> )            | NC (1.06)   | S16 (3.01)  | S14 (2.05) | D14 (6.56) |
| 1417312_at   | Dkk3          | dickkopf homolog 3 ( <i>Xenopus laevis</i> )            | NC (1.24)   | S16 (2.29)  | NC (1.11)  | D14 (2.57) |
| 1437284_at   | Fzd1          | frizzled homolog 1 ( <i>Drosophila</i> )                | NC (1.42)   | S16 (2.14)  | NC (1.04)  | D14 (3.15) |
| 1418532_at   | Fzd2          | frizzled homolog 2 ( <i>Drosophila</i> )                | NC (1.62)   | S16 (4.55)  | S14 (2.00) | D14 (5.61) |
| 1449730_s_at | Fzd3          | frizzled homolog 3 ( <i>Drosophila</i> )                | NC (1.12)   | NC (1.76)   | NC (1.43)  | D14 (2.24) |
| 1417301_at   | Fzd6          | frizzled homolog 6 ( <i>Drosophila</i> )                | NC (1.45)   | S16 (2.59)  | NC (1.14)  | NC (1.57)  |
| 1450044_at   | Fzd7          | frizzled homolog 7 ( <i>Drosophila</i> )                | NC (1.19)   | NC (1.95)   | S14 (2.46) | D14 (4.02) |
| 1451022_at   | Lrp6          | low density lipoprotein receptor-related protein 6      | NC (1.36)   | NC (1.19)   | S14 (2.02) | NC (1.76)  |
| 1417278_a_at | Nkd1          | naked cuticle 1 homolog ( <i>Drosophila</i> )           | NC (1.46)   | NC (1.67)   | NC (1.14)  | D14 (2.14) |
| 1452249_at   | Prickle1      | prickle like 1 ( <i>Drosophila</i> )                    | NC (1.19)   | NC (1.50)   | NC (1.51)  | D14 (2.70) |
| 1428808_at   | Prickle2      | prickle-like 2 ( <i>Drosophila</i> )                    | NC (1.62)   | NC (1.62)   | NC (1.50)  | D14 (3.94) |
| 1446780_at   | Ror2          | Receptor tyrosine kinase-like orphan receptor 2         | NC (1.11)   | NC (1.52)   | S14 (2.07) | NC (1.23)  |
| 1423986_a_at | Scotin        | scotin gene                                             | NC (1.03)   | NC (1.06)   | S16 (3.35) | D16 (3.66) |
| 1448395_at   | Sfrp1         | secreted frizzled-related sequence protein 1            | NC (1.29)   | S16 (2.17)  | S14 (3.24) | D14 (5.45) |
| 1448201_at   | Sfrp2         | secreted frizzled-related protein 2                     | NC (1.28)   | S16 (6.37)  | NC (1.55)  | D14 (7.70) |
| 1451031_at   | Sfrp4         | secreted frizzled-related sequence protein 4            | NC (1.91)   | S16 (2.52)  | S16 (2.13) | NC (1.62)  |
| 1436075_at   | Sfrp5         | secreted frizzled-related sequence protein 5            | D14 (31.69) | D16 (10.66) | NC (1.58)  | D14 (4.71) |
| 1450117_at   | Tcf3          | transcription factor 3                                  | NC (1.45)   | S16 (5.35)  | NC (1.63)  | D14 (6.03) |
| 1441756_at   | Tcf7l2        | Transcription factor 7-like 2, T-cell specific, HMG-box | NC (1.87)   | NC (1.43)   | S14 (2.45) | NC (1.87)  |
| 1423852_at   | Tmem46        | transmembrane protein 46                                | D14 (2.79)  | NC (1.84)   | NC (1.02)  | D14 (5.03) |
| 1438426_at   | Tmem58        | transmembrane protein 58                                | NC (1.03)   | S16 (2.25)  | NC (1.64)  | D14 (3.61) |
| 1436118_at   | Vangl2        | vang-like 2 ( <i>van gogh</i> , <i>Drosophila</i> )     | NC (1.10)   | S16 (2.78)  | NC (1.81)  | D14 (4.56) |
| 1450772_at   | Wnt11         | wingless-related MMTV integration site 11               | NC (1.48)   | S16 (2.21)  | NC (1.93)  | NC (1.29)  |
| 1450782_at   | Wnt4          | wingless-related MMTV integration site 4                | NC (1.35)   | S16 (4.35)  | S16 (6.34) | NC (1.97)  |
| 1436791_at   | Wnt5a         | wingless-related MMTV integration site 5A               | S14 (2.34)  | S16 (4.38)  | NC (1.59)  | D14 (2.99) |
| 1436978_at   | Wnt9a         | wingless-type MMTV integration site 9A                  | NC (1.22)   | NC (1.47)   | NC (1.20)  | D14 (2.17) |

Note: NC means no significant change (significant change is  $FC \geq 2$  and  $p < 0.05$ ). For each comparison, the label (e.g., D14, D16, S14, S16) refers to the time and/or tissue of maximum expression and the number in parentheses is the fold change.



Supplemental Table 5. Summary of pyloric genes

| Probeset ID  | Symbol        | Description                                                             | P14-S14    | P14-D14    | P16-S16     | P16-D16     |
|--------------|---------------|-------------------------------------------------------------------------|------------|------------|-------------|-------------|
| 1459266_at   | ---           | ---                                                                     | P14 (2.05) | P14 (2.08) | NC (1.53)   | NC (1.47)   |
| 1429286_at   | 1190003M12Rik | RIKEN cDNA 1190003M12 gene                                              | NC (1.12)  | NC (1.64)  | P16 (2.48)  | P16 (12.56) |
| 1424439_at   | 1810065E05Rik | RIKEN cDNA 1810065E05 gene                                              | NC (1.76)  | NC (1.67)  | P16 (4.51)  | P16 (6.56)  |
| 1425233_at   | 2210407C18Rik | RIKEN cDNA 2210407C18 gene                                              | P14 (5.01) | P14 (2.87) | NC (1.00)   | P16 (17.46) |
| 1427437_at   | 2610203C20Rik | RIKEN cDNA 2610203C20 gene                                              | NC (1.54)  | P14 (2.87) | P16 (2.40)  | P16 (2.20)  |
| 1432556_a_at | 3100002J23Rik | RIKEN cDNA 3100002J23 gene                                              | P14 (6.30) | NC (1.46)  | P16 (2.65)  | P16 (2.19)  |
| 1438798_at   | 4931406P16Rik | RIKEN cDNA 4931406P16 gene                                              | NC (1.62)  | NC (1.75)  | P16 (2.92)  | P16 (2.18)  |
| 1435163_at   | 9030612M13Rik | RIKEN cDNA 9030612M13 gene                                              | P14 (2.19) | P14 (2.45) | P16 (3.37)  | NC (1.75)   |
| 1438531_at   | A730054J21Rik | RIKEN cDNA A730054J21 gene                                              | NC (1.69)  | P14 (2.65) | P16 (2.47)  | P16 (3.95)  |
| 1415927_at   | Actc1         | actin, alpha, cardiac                                                   | NC (1.91)  | NC (1.24)  | P16 (2.04)  | P16 (2.58)  |
| 1451675_a_at | Alas2         | aminolevulinic acid synthase 2, erythroid                               | P14 (3.26) | P14 (2.03) | P16 (2.89)  | P16 (3.41)  |
| 1416649_at   | Ambp          | alpha 1 microglobulin/bikunin                                           | P14 (2.20) | NC (1.33)  | P16 (8.72)  | P16 (2.39)  |
| 1459253_at   | Arrdc3        | Arrestin domain containing 3                                            | P14 (2.57) | P14 (2.84) | NC (1.27)   | NC (1.08)   |
| 1443801_at   | AW822216      | Expressed sequence AW822216                                             | NC (1.55)  | NC (1.84)  | P16 (3.37)  | P16 (2.10)  |
| 1438663_at   | Bat2d         | BAT2 domain containing 1                                                | NC (1.32)  | n/1 (1.87) | P16 (2.34)  | P16 (2.28)  |
| 1440990_at   | BC056349      | cDNA sequence BC056349                                                  | NC (1.83)  | P14 (2.34) | P16 (2.25)  | P16 (3.26)  |
| 1457458_at   | BC057627      | cDNA sequence BC057627                                                  | NC (1.50)  | NC (1.77)  | P16 (2.14)  | P16 (2.10)  |
| 1450624_at   | Bhmt          | betaine-homocysteine methyltransferase                                  | NC (1.96)  | NC (1.64)  | P16 (2.56)  | P16 (2.89)  |
| 1439040_at   | Cenpe         | centromere protein E                                                    | NC (1.40)  | NC (1.55)  | P16 (2.25)  | P16 (3.42)  |
| 1427767_a_at | Cftr          | cystic fibrosis transmembrane conductance regulator homolog             | NC (1.40)  | NC (1.04)  | P16 (3.73)  | P16 (2.33)  |
| 1436343_at   | Chd4          | chromodomain helicase DNA binding protein 4                             | NC (1.37)  | NC (1.63)  | P16 (2.46)  | P16 (2.19)  |
| 1439427_at   | Cldn9         | claudin 9                                                               | NC (1.32)  | NC (1.41)  | P16 (2.53)  | P16 (2.67)  |
| 1428571_at   | Col9a1        | procollagen, type IX, alpha 1                                           | P14 (2.76) | P14 (2.48) | P16 (4.63)  | P16 (10.41) |
| 1448326_a_at | Crabp1        | cellular retinoic acid binding protein I                                | NC (1.63)  | P14 (5.02) | P16 (2.14)  | P16 (5.53)  |
| 1424598_at   | Ddx6          | DEAD (Asp-Glu-Ala-Asp) box polypeptide 6                                | NC (1.49)  | P14 (2.13) | P16 (2.68)  | P16 (3.54)  |
| 1437403_at   | E130306M17Rik | RIKEN cDNA E130306M17 gene                                              | P14 (2.30) | P14 (2.23) | P16 (2.80)  | P16 (4.29)  |
| 1456319_at   | EG665081      | predicted gene, EG665081                                                | P14 (2.19) | P14 (2.36) | NC (1.58)   | NC (1.72)   |
| 1449077_at   | Eraf          | erythroid associated factor                                             | P14 (2.46) | NC (1.71)  | P16 (2.88)  | P16 (3.60)  |
| 1456326_at   | Gm784         | gene model 784, (NCBI)                                                  | NC (1.46)  | NC (1.04)  | P16 (2.24)  | P16 (4.08)  |
| 1423436_at   | Gsta3         | glutathione S-transferase, alpha 3                                      | P14 (4.12) | NC (1.01)  | P16 (2.97)  | P16 (2.24)  |
| 1423016_a_at | Gypa          | glycophorin A                                                           | P14 (2.86) | NC (1.96)  | P16 (4.00)  | P16 (4.59)  |
| 1448716_at   | Hba-x         | hemoglobin X, alpha-like embryonic chain in Hba complex                 | P14 (2.14) | NC (1.33)  | P16 (2.17)  | P16 (2.70)  |
| 1427866_x_at | Hbb-b1        | hemoglobin, beta adult major chain                                      | P14 (2.46) | NC (1.92)  | P16 (2.44)  | P16 (3.60)  |
| 1418199_at   | Hemgn         | Hemogen                                                                 | P14 (3.02) | P14 (2.07) | P16 (3.14)  | P16 (3.79)  |
| 1426114_at   | Hnrpab        | heterogeneous nuclear ribonucleoprotein A/B                             | NC (1.39)  | NC (1.29)  | P16 (2.67)  | P16 (2.00)  |
| 1458492_x_at | Hnt           | Neurotrimin                                                             | NC (1.26)  | P14 (2.59) | P16 (2.32)  | P16 (3.77)  |
| 1423276_at   | Ildr1         | immunoglobulin-like domain containing receptor 1                        | NC (1.41)  | NC (1.41)  | P16 (2.85)  | P16 (2.07)  |
| 1442368_at   | Kctd12b       | potassium channel tetramerisation domain containing 12b                 | NC (1.72)  | NC (1.80)  | P16 (2.49)  | P16 (3.28)  |
| 1460258_at   | Lect1         | leukocyte cell derived chemotaxin 1                                     | P14 (4.27) | P14 (4.45) | NC (1.06)   | NC (1.52)   |
| 1422071_at   | Lgals6        | lectin, galactose binding, soluble 6                                    | P14 (7.12) | P14 (4.57) | P16 (2.79)  | P16 (2.29)  |
| 1421278_s_at | LOC630963     | similar to spectrin alpha 1                                             | P14 (4.19) | NC (1.50)  | P16 (5.80)  | P16 (5.54)  |
| 1418188_a_at | Malat1        | Metastasis associated lung adenocarcinoma transcript 1 (non-coding RNA) | NC (1.27)  | P14 (2.21) | P16 (3.23)  | P16 (4.01)  |
| 1451989_a_at | Mapre2        | microtubule-associated protein, RP/EB family, member 2                  | NC (1.31)  | NC (1.01)  | P16 (2.13)  | P16 (2.14)  |
| 1422643_at   | Moxd1         | monooxygenase, DBH-like 1                                               | P14 (2.12) | NC (1.07)  | P16 (2.30)  | P16 (3.95)  |
| 1437250_at   | Mreg          | Melanoregulin                                                           | S14 (3.33) | D14 (3.12) | S16 (-4.30) | NC (1.01)   |
| 1435521_at   | Msi2          | Musashi homolog 2 (Drosophila)                                          | NC (1.51)  | P14 (2.03) | P16 (2.25)  | P16 (3.03)  |
| 1436309_at   | Neto2         | neuropilin (NRP) and tolloid (TLL)-like 2                               | P14 (2.36) | NC (1.00)  | P16 (2.24)  | P16 (2.98)  |
| 1448290_at   | Pap           | pancreatitis-associated protein                                         | P14 (2.67) | D14 (2.09) | P16 (63.15) | P16 (2.80)  |
| 1428952_at   | Pdia2         | protein disulfide isomerase associated 2                                | NC (1.41)  | NC (1.07)  | S16 (5.69)  | D16 (2.88)  |
| 1460332_at   | Pln           | Phospholamban                                                           | NC (1.91)  | NC (1.60)  | P16 (2.00)  | P16 (3.63)  |
| 1448186_at   | Pnliprp2      | pancreatic lipase-related protein 2                                     | P14 (2.49) | NC (1.50)  | P16 (23.05) | P16 (2.39)  |
| 1449876_at   | Prkg1         | protein kinase, cGMP-dependent, type I                                  | NC (1.82)  | NC (1.19)  | P16 (2.33)  | P16 (2.97)  |
| 1460633_at   | Prpf19        | PRP19/PSO4 pre-mRNA processing factor 19 homolog (S. cerevisiae)        | NC (1.81)  | NC (1.66)  | P16 (2.02)  | P16 (2.12)  |
| 1454791_a_at | Rbbp4         | retinoblastoma binding protein 4                                        | NC (1.94)  | P14 (2.11) | P16 (2.56)  | P16 (2.44)  |

| Probeset ID        | Symbol  | Description                                                          | P14-S14    | P14-D14    | P16-S16    | P16-D16    |
|--------------------|---------|----------------------------------------------------------------------|------------|------------|------------|------------|
| <b>(continued)</b> |         |                                                                      |            |            |            |            |
| 1438069_at         | Rbm5    | RNA binding motif protein 5                                          | NC (1.75)  | P14 (2.16) | P16 (3.15) | P16 (2.88) |
| 1442263_at         | Rgs13   | regulator of G-protein signaling 13                                  | NC (1.03)  | NC (1.01)  | P16 (3.50) | P16 (2.90) |
| 1419014_at         | Rhag    | Rhesus blood group-associated A glycoprotein                         | P14 (2.84) | P14 (2.01) | P16 (2.12) | P16 (2.33) |
| 1422552_at         | Rprm    | reprimo, TP53 dependent G2 arrest mediator candidate                 | NC (1.76)  | P14 (5.06) | P16 (2.14) | P16 (3.67) |
| 1460623_at         | Skap2   | src family associated phosphoprotein 2                               | P14 (2.56) | P14 (2.06) | NC (1.19)  | NC (1.04)  |
| 1447517_at         | Skiv2l2 | superkiller viralicidic activity 2-like 2 (S. cerevisiae)            | P14 (3.88) | P14 (3.84) | NC (1.31)  | NC (1.51)  |
| 1420334_at         | Slc12a8 | solute carrier family 12 (potassium/chloride transporters), member 8 | NC (1.22)  | NC (1.22)  | P16 (2.77) | P16 (2.04) |
| 1434502_x_at       | Slc4a1  | solute carrier family 4 (anion exchanger), member 1                  | P14 (2.69) | NC (1.71)  | P16 (4.11) | P16 (5.28) |
| 1436853_a_at       | Snca    | synuclein, alpha                                                     | NC (1.90)  | NC (1.72)  | P16 (2.40) | P16 (3.87) |
| 1421277_at         | Spna1   | spectrin alpha 1                                                     | P14 (2.96) | NC (1.22)  | P16 (2.73) | P16 (2.09) |
| 1441858_at         | Uck2    | Uridine-cytidine kinase 2                                            | NC (1.23)  | P14 (2.03) | P16 (2.19) | P16 (2.42) |
| 1439174_at         | Unc5c   | Unc-5 homolog C (C. elegans)                                         | NC (1.77)  | NC (1.09)  | P16 (2.48) | P16 (2.28) |
| 1426305_at         | Upk1a   | uropod 1A                                                            | P14 (2.73) | NC (1.27)  | P16 (4.91) | P16 (4.09) |
| 1446886_at         | Usp3    | Ubiquitin specific peptidase 3                                       | P14 (2.23) | P14 (2.86) | P16 (2.56) | NC (1.20)  |
| 1419195_at         | Wfdc15  | WAP four-disulfide core domain 15                                    | P14 (2.50) | NC (1.20)  | P16 (2.90) | P16 (2.34) |

Note: NC means no significant change (significant change is  $FC \geq 2.0$  and  $p < 0.05$ ). For each comparison, the label (e.g., P14, P16, D14, D16, S14, S16) refers to the time and/or tissue of maximum expression and the number in parentheses is the fold change.
